# Supplementary material for: Nitric Oxide Enhances Cytotoxicity of Lead by Modulating the Generation of Reactive Oxygen Species and Is Involved in the Regulation of Pb2+ and Ca2+ Fluxes in Tobacco BY-2 Cells
Source: MDPI journal article supplement (doi:10.3390/plants8100403), 2019-10-09
Supplement: s1 [file s1]

# Supplementary Materials

## Supplementary Method

### *TUNEL Assay*

The PCD of tobacco BY-2 cells was determined with a TUNEL apoptosis detection kit (DeadEnd™ Fluorometric TUNEL System, Promega, Madison, WI, USA) according to the manufacturer's instructions. Briefly, cells were washed in PBS, and 50  $\mu\text{L}$  of the BY-2 cells were pipetted onto poly-L-lysine-coated slides. Then, the cells were fixed by immersing the slides in freshly prepared 4% paraformaldehyde solution in PBS for 30 min at 4 °C and incubated in 50  $\mu\text{L}$  of the TUNEL reaction mixture for 1 h in the dark at 37 °C. After that, the samples were stained with PI (1  $\mu\text{g mL}^{-1}$ ) for 15 min at room temperature in the dark. A negative control was carried out without terminal deoxynucleotidyl transferase (TdT) and a positive control was carried out with DNase I before the TUNEL reaction. The fluorescence of the samples was detected using a fluorescence microscope (Olympus BX61, Tokyo, Japan).

## Supplementary Figures

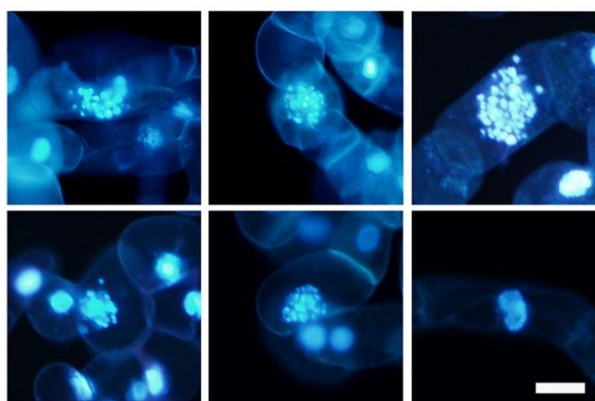

**Figure S1.** Typical cells with nuclei containing condensed or granular chromatin. Hoechst 33342 staining in cultured tobacco BY-2 cells treated with 250  $\mu\text{M}$   $\text{Pb}(\text{NO}_3)_2$  for 24 h. Scale bar = 50  $\mu\text{m}$ .

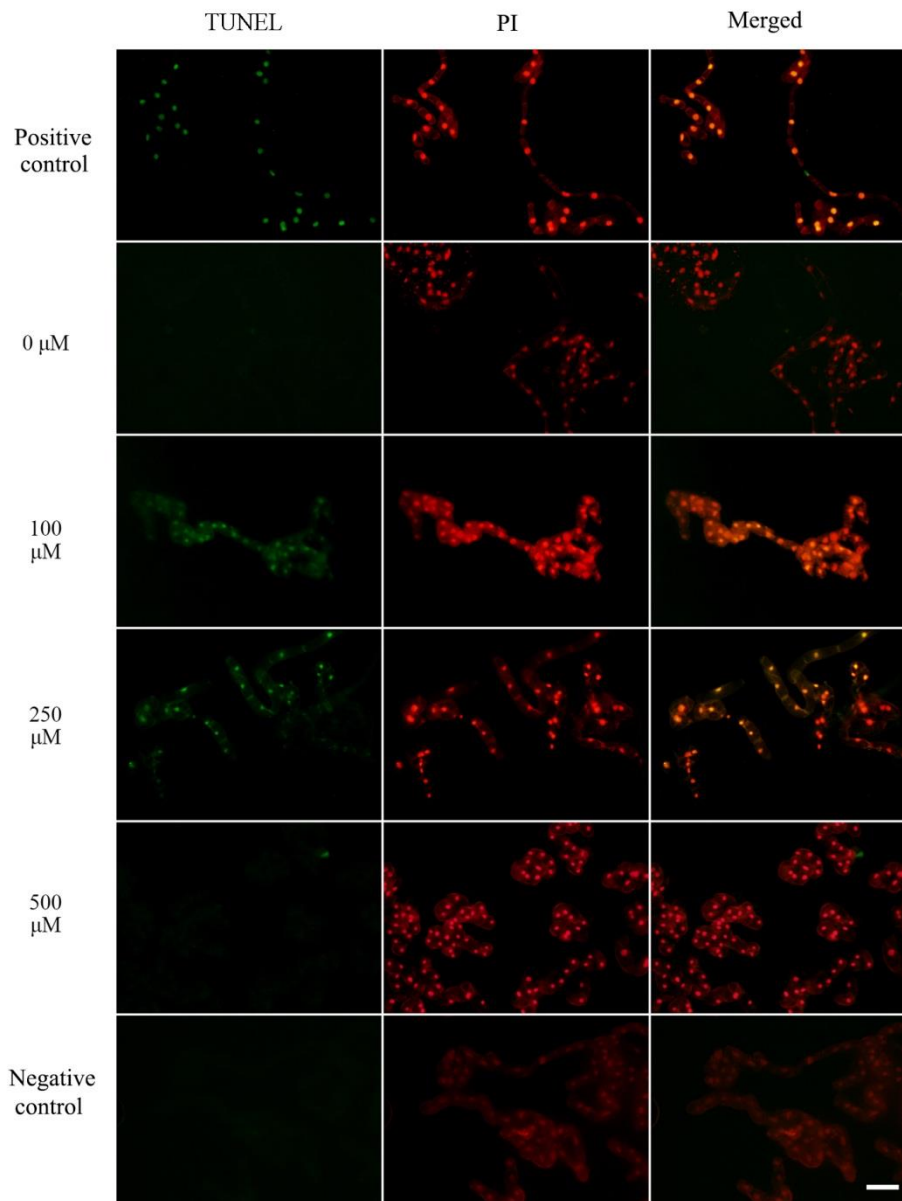

**Figure S2.** Programmed cell death detection using the TUNEL assay. Tobacco BY-2 cells that received the same volume of distilled water were used as a control. Four-day-old tobacco BY-2 cells were treated with different concentrations (100, 250, and 500  $\mu\text{M}$ ) of  $\text{Pb}(\text{NO}_3)_2$  for 24 h. Left column: TUNEL images; middle column: PI images; right column: merged images of TUNEL and PI. Scale bar = 100  $\mu\text{m}$ .
